# Supplementary material
Source: publisher figshare collection journal article supplement (https://gsapubs.figshare.com/ndownloader/files/24623006)
Supplement: Supplementary file 1 [file 24623006]

Supplementary table. Landslide inventory data, including coordinates of the initiation site and slope characteristics of the landslides evaluated. The unit column indicates the underlying geologic unit as described in Table 1. Slope characteristics include area (m2); slope angle (°); slope aspect (°), planform hillslope curvature (unitless); active layer thickness/seasonal frost thickness (m), where positive values indicate active layer thickness and negative values indicate seasonal frost depth; mean decadal ground temperature (°C); and landslide style. “Active layer detachment” is abbreviated as ALD. Landslides that initiated outside of the map area (IDs 21, 33, 37, 86, 87) do not include values for unit, slope, aspect, etc.

| ID | Latitude | Longitude | Unit | Area | Slope | Aspect | Elev | Curv | ALT | MDGT | Style |
| --- | --- | --- | --- | --- | --- | --- | --- | --- | --- | --- | --- |
| 1 | 63.42646 | -150.3730 | Tmg | 66324 | 29.4 | 187.6 | 1017 | -1.136 | 1.03 | -0.22 | rotational slide |
| 2 | 63.42768 | -150.3647 | Tmg | 1771 | 28.5 | 184.0 | 1046 | 0.124 | 1.03 | -0.19 | rotational slide |
| 3 | 63.42833 | -150.3525 | TRn | 307 | 30.4 | 104.9 | 1076 | 0.782 | 1.02 | -0.21 | debris slide |
| 4 | 63.42782 | -150.3739 | Tmg | 15089 | 17.5 | 253.9 | 1065 | -0.182 | 1.03 | -0.23 | debris slide |
| 5 | 63.43052 | -150.3518 | Tmga | 4161 | 18.9 | 192.7 | 1171 | -0.315 | -0.73 | 0.36 | debris aval. |
| 6 | 63.43066 | -150.3525 | Tmga | 10215 | 27.5 | 195.8 | 1172 | -0.011 | -0.72 | 0.36 | debris flow |
| 7 | 63.43121 | -150.3432 | TRn | 22689 | 29.7 | 311.5 | 1239 | -1.494 | -0.72 | 0.36 | rotational slide |
| 8 | 63.43146 | -150.2948 | Qgo | 3407 | 12.0 | 162.4 | 1129 | -0.119 | -0.74 | 0.36 | ALD |
| 9 | 63.43468 | -150.3142 | TRn | 446 | 33.3 | 182.9 | 1260 | 0.698 | -0.63 | 0.64 | rotational slide |
| 10 | 63.43835 | -150.2835 | Qcol | 962 | 20.0 | 148.4 | 1242 | 0.016 | -0.64 | 0.71 | rotational slide |
| 11 | 63.44072 | -150.2721 | Qcol | 464 | 9.0 | 135.1 | 1190 | 0.339 | -0.70 | 0.51 | rotational slide |
| 12 | 63.44227 | -150.2679 | Qcol | 1455 | 16.0 | 163.6 | 1194 | 0.357 | -0.70 | 0.51 | rotational slide |
| 13 | 63.44330 | -150.2663 | Qcol | 3002 | 19.7 | 125.8 | 1208 | 0.045 | -0.70 | 0.51 | debris slide |
| 14 | 63.45284 | -150.2250 | TRn | 1100 | 24.8 | 307.2 | 1194 | 0.409 | 0.94 | -0.51 | debris slide |
| 15 | 63.45601 | -150.2322 | Qgm | 681 | 14.8 | 226.1 | 1147 | 0.273 | 1.57 | -0.28 | debris aval. |
| 16 | 63.45741 | -150.2276 | Qgm | 298 | 11.4 | 316.4 | 1186 | -0.792 | 1.50 | -0.41 | debris slide |
| 17 | 63.45820 | -150.2295 | Qgm | 2365 | 18.1 | 306.1 | 1152 | -0.014 | 1.57 | -0.28 | debris slide |
| 18 | 63.45856 | -150.2265 | Qgm | 2011 | 21.2 | 299.0 | 1180 | -0.616 | 1.51 | -0.40 | debris slide |
| 19 | 63.45890 | -150.2250 | Qgm | 3506 | 14.7 | 270.4 | 1194 | -0.504 | 1.51 | -0.40 | rotational slide |
| 20 | 63.46050 | -150.2224 | Qgm | 319 | 16.3 | 315.1 | 1196 | -0.068 | 0.90 | -0.99 | debris slide |
| 21 | 63.45557 | -150.2561 |  | 316871 |  |  |  |  |  |  | rotational slide |
| 22 | 63.46014 | -150.2178 | Qgm | 2010 | 12.7 | 11.7 | 1211 | 0.172 | 1.44 | -0.55 | ALD |
| 23 | 63.46089 | -150.2139 | Qgm | 1104 | 14.8 | 29.7 | 1182 | -0.637 | 0.90 | -0.99 | ALD |
| 24 | 63.46079 | -150.2150 | Qgm | 827 | 16.5 | 10.0 | 1190 | -0.450 | 1.44 | -0.56 | ALD |
| 25 | 63.46286 | -150.2204 | Qgm | 1494 | 10.3 | 116.5 | 1182 | 0.141 | 0.90 | -1.00 | rotational slide |
| 26 | 63.46756 | -150.2204 | TRn | 6374 | 35.7 | 42.2 | 1254 | -0.803 | 0.86 | -0.72 | rotational slide |
| 27 | 63.48298 | -150.1163 | Qmw | 3242 | 15.1 | 279.8 | 1113 | 0.047 | 0.98 | -0.30 | rotational slide |
| 28 | 63.48476 | -150.1138 | Qmw | 198 | 18.9 | 318.2 | 1110 | 1.010 | 1.00 | -0.34 | rotational slide |
| 29 | 63.48589 | -150.1219 | Qg | 1812 | 12.6 | 137.0 | 1163 | -0.480 | 0.97 | -0.43 | debris flow |
| 30 | 63.48635 | -150.1211 | Qg | 289 | 20.6 | 31.1 | 1156 | -1.254 | 0.97 | -0.43 | debris slide |
| 31 | 63.48635 | -150.1192 | Qg | 436 | 23.7 | 72.8 | 1133 | 1.584 | 0.97 | -0.43 | debris aval. |
| 32 | 63.48666 | -150.1238 | Qg | 3861 | 12.6 | 78.0 | 1186 | 1.512 | 0.97 | -0.43 | rotational slide |
| 33 | 63.48749 | -150.1512 |  | 137503 |  |  |  |  |  |  | earthflow |
| 34 | 63.48774 | -150.1161 | Qmw | 1344 | 18.2 | 163.8 | 1129 | 1.029 | 1.00 | -0.34 | rotational slide |
| 35 | 63.48766 | -150.1241 | Qg | 456 | 15.1 | 84.9 | 1169 | 0.534 | 0.97 | -0.44 | rotational slide |
| 36 | 63.48794 | -150.1150 | Qmw | 995 | 13.4 | 82.6 | 1121 | -0.037 | 1.00 | -0.35 | rotational slide |
| 37 | 63.48901 | -150.1495 |  | 110510 |  |  |  |  |  |  | earthflow |
| 38 | 63.48830 | -150.1222 | Qal | 374 | 3.4 | 111.8 | 1154 | -0.105 | 0.97 | -0.44 | debris slide |
| 39 | 63.48923 | -150.1158 | Qmw | 8178 | 18.2 | 264.1 | 1144 | 1.235 | 1.00 | -0.35 | debris slide |
| 40 | 63.49026 | -150.1129 | Qmw | 1772 | 13.8 | 351.9 | 1135 | -0.431 | 1.00 | -0.35 | debris slide |
| 41 | 63.49058 | -150.1120 | Qmw | 951 | 24.4 | 1.0 | 1127 | 0.956 | 1.00 | -0.35 | debris slide |
| 42 | 63.49179 | -150.0875 | Qmw | 109 | 27.5 | 3.0 | 1058 | -0.632 | 1.01 | -0.26 | debris slide |
| 43 | 63.49165 | -150.0891 | Qmw | 1790 | 34.0 | 300.4 | 1054 | 0.584 | 1.01 | -0.26 | debris slide |
| 44 | 63.49200 | -150.0835 | Qmw | 2340 | 26.8 | 339.3 | 1079 | -0.164 | 1.00 | -0.12 | rotational slide |
| 45 | 63.49215 | -150.0853 | Qmw | 6603 | 10.1 | 319.7 | 1060 | -0.331 | 1.01 | -0.26 | rotational slide |
| 46 | 63.49318 | -150.1222 | Qmw | 6411 | 26.2 | 143.8 | 1203 | 0.184 | 0.97 | -0.44 | rotational slide |
| 47 | 63.49379 | -150.0817 | Qmw | 2203 | 19.5 | 7.2 | 1044 | -0.879 | 1.00 | -0.12 | rotational slide |
| 48 | 63.49786 | -150.1115 | Qmw | 1169 | 27.8 | 83.5 | 1170 | -1.052 | 1.00 | -0.36 | debris slide |
| 49 | 63.49810 | -150.0837 | Qg | 659 | 14.7 | 134.6 | 1046 | 0.081 | 1.02 | -0.14 | debris slide |
| 50 | 63.49813 | -150.1165 | Qmw | 12573 | 18.5 | 171.3 | 1190 | -1.260 | 0.97 | -0.44 | ALD |
| 51 | 63.49817 | -150.1121 | Qmw | 391 | 24.4 | 25.6 | 1179 | 0.216 | 1.00 | -0.36 | debris slide |
| 52 | 63.49838 | -150.0877 | Qg | 739 | 23.2 | 178.2 | 1095 | 0.046 | 0.97 | -0.50 | debris aval. |
| 53 | 63.51207 | -149.9679 | Qmw | 20129 | 23.9 | 131.9 | 1049 | -1.145 | 1.01 | -0.57 | earthflow |
| 54 | 63.51289 | -149.9936 | Qcol | 4907 | 7.4 | 187.6 | 974 | -0.139 | 1.01 | -0.49 | earthflow |
| 55 | 63.51325 | -149.9787 | Kc | 2105 | 11.3 | 255.4 | 1018 | -0.022 | 0.97 | -0.60 | debris slide |
| 56 | 63.51355 | -149.9417 | Ttb | 2933 | 2.7 | 311.5 | 1084 | 0.457 | 0.94 | -0.67 | ALD |
| 57 | 63.51611 | -150.0047 | Qcol | 1043 | 25.3 | 214.7 | 972 | 0.541 | 1.05 | -0.44 | debris slide |
| 58 | 63.51807 | -150.0129 | TRn | 2918 | 39.5 | 191.0 | 974 | 1.019 | 1.00 | -0.15 | debris slide |
| 59 | 63.52394 | -149.9374 | Kc | 2920 | 16.5 | 151.3 | 1198 | -0.013 | 1.79 | -0.24 | ALD |
| 60 | 63.52703 | -149.8996 | Qcol | 11171 | 12.5 | 141.4 | 1130 | -0.656 | 1.89 | -0.01 | debris slide |
| 61 | 63.53501 | -149.8488 | Kc | 943 | 30.2 | 126.6 | 1227 | 0.506 | 0.91 | -0.34 | rockslide |
| 62 | 63.53531 | -149.8303 | Ttr | 2059 | 22.0 | 172.7 | 1131 | -0.009 | 0.93 | -0.24 | rockslide |
| 63 | 63.53568 | -149.8285 | Ttr | 4252 | 10.7 | 177.2 | 1132 | -1.030 | 0.95 | -0.14 | rockslide |
| 64 | 63.53704 | -149.8150 | Ttr | 2690 | 32.7 | 200.6 | 1176 | 2.984 | 0.95 | -0.14 | debris aval. |
| 65 | 63.53877 | -149.8169 | Ttr | 107723 | 20.1 | 227.2 | 1224 | 0.829 | 0.93 | -0.19 | debris aval. |
| 66 | 63.53899 | -149.8219 | Ttb | 4325 | 37.0 | 248.2 | 1141 | 0.769 | 0.93 | -0.19 | rotational slide |
| 67 | 63.54071 | -149.8051 | Ttr | 48204 | 17.8 | 147.6 | 1048 | 0.031 | 0.91 | -0.31 | debris slide |
| 68 | 63.55031 | -149.7317 | Tu | 12170 | 28.0 | 311.6 | 1089 | 1.992 | 0.91 | -0.22 | rotational slide |
| 69 | 63.55318 | -149.8028 | Ttr | 641 | 17.8 | 109.9 | 1095 | 0.116 | 0.97 | -0.04 | rotational slide |
| 70 | 63.55352 | -149.8005 | Ttr | 606 | 24.0 | 156.9 | 1088 | -0.368 | 0.97 | -0.05 | debris slide |
| 71 | 63.55462 | -149.7661 | Qgo | 803 | 31.9 | 5.3 | 995 | 0.617 | -0.77 | 0.03 | ALD |
| 72 | 63.55469 | -149.7664 | Qgo | 803 | 26.7 | 9.0 | 993 | -0.438 | -0.77 | 0.03 | ALD |
| 73 | 63.55559 | -149.6628 | Tta | 2896 | 16.4 | 160.4 | 1216 | 0.074 | 1.55 | -0.51 | ALD |
| 74 | 63.55849 | -149.7997 | Ttr | 6124 | 38.4 | 65.0 | 998 | 1.027 | 0.97 | -0.04 | debris aval. |
| 75 | 63.56354 | -149.6370 | Ttb | 71 | 28.6 | 285.4 | 1127 | 1.265 | 0.92 | -0.20 | debris slide |
| 76 | 63.56461 | -149.6459 | Tta | 164 | 34.3 | 356.8 | 1151 | 1.710 | -1.41 | 0.07 | debris slide |
| 77 | 63.56474 | -149.6450 | Tta | 3888 | 31.1 | 64.2 | 1130 | -0.262 | -1.41 | 0.07 | debris slide |
| 78 | 63.57064 | -149.6248 | Tta | 3142 | 33.1 | 248.6 | 1111 | 1.345 | 0.95 | -0.09 | debris aval. |
| 79 | 63.57137 | -149.6221 | Tta | 2633 | 33.0 | 265.0 | 1172 | -1.031 | 0.00 | 0.00 | debris flow |
| 80 | 63.58134 | -149.6163 | Kc | 281 | 26.8 | 3.5 | 1041 | -0.324 | 0.94 | -0.19 | debris slide |
| 81 | 63.58400 | -149.6171 | Qcol | 578 | 30.2 | 279.8 | 992 | 0.638 | 0.99 | -0.01 | debris slide |
| 82 | 63.58540 | -149.6165 | Qcol | 412 | 25.5 | 295.0 | 989 | -1.267 | 0.99 | -0.02 | debris slide |
| 83 | 63.59178 | -149.6052 | Qcol | 505 | 28.5 | 285.4 | 1085 | -0.951 | -0.84 | 0.01 | debris slide |
| 84 | 63.59539 | -149.6026 | Qcol | 1278 | 20.5 | 324.3 | 1011 | 0.043 | -0.82 | 0.05 | rotational slide |
| 85 | 63.59533 | -149.6003 | Qcol | 9482 | 31.8 | 311.2 | 1058 | 0.763 | -0.84 | 0.04 | rotational slide |
| 86 | 63.60583 | -149.6124 |  | 11142 |  |  |  |  |  |  | debris aval. |
| 87 | 63.60600 | -149.6064 |  | 4727 |  |  |  |  |  |  | debris aval. |
| 88 | 63.49258 | -150.1264 | Qmw | 10 | 21.9 | 144.9 | 1222 | -1.636 | 0.97 | -0.44 | rotational slide |
| 89 | 63.46397 | -150.2075 | Qgm | 10 | 20.6 | 44.8 | 1104 | -0.292 | 0.94 | -0.85 | rotational slide |
| 90 | 63.45918 | -150.2247 | Qgm | 5 | 11.0 | 276.0 | 1196 | 0.472 | 1.51 | -0.40 | ALD |
